# Supplementary material for: Distant Closeness: Cameraphones and Public Image Sharing
Source: Royal Society of Chemistry journal article supplement (doi:10.1039/b618981d), 2006-01-01
Supplement: b618981d.pdf [file b618981d.pdf]

## Supplementary Information

### Synthesis, Characterization and Luminescence Properties of Three Multidimensional Metal-Organic Frameworks incorporating 5- (pyrimidyl)tetrazolate

*A. Rodríguez-Diéguez,<sup>a</sup> A. Salinas-Castillo,<sup>b</sup> S. Galli,<sup>\*c</sup> N. Masciocchi,<sup>c</sup> J. M. Gutiérrez-Zorrilla,<sup>d</sup>  
P. Vitoria,<sup>d</sup> E. Colacio<sup>\*a</sup>*

<sup>a</sup> *Departamento de Química Inorgánica, Universidad de Granada, Avenida Fuentenueva s/n, 18071 Granada, Spain*

<sup>b</sup> *Departamento de Química Analítica, Universidad de Granada, Avenida Fuentenueva s/n, 18071 Granada, Spain*

<sup>c</sup> *Dipartimento di Scienze Chimiche e Ambientali, Università dell'Insubria, Via Valleggio 11, 22100 Como, Italy*

<sup>d</sup> *Departamento de Química Inorgánica, Fac. Ciencia y Tecnología, Universidad del País Vasco, P.O. Box 644, E-48080 Bilbao, Spain.*

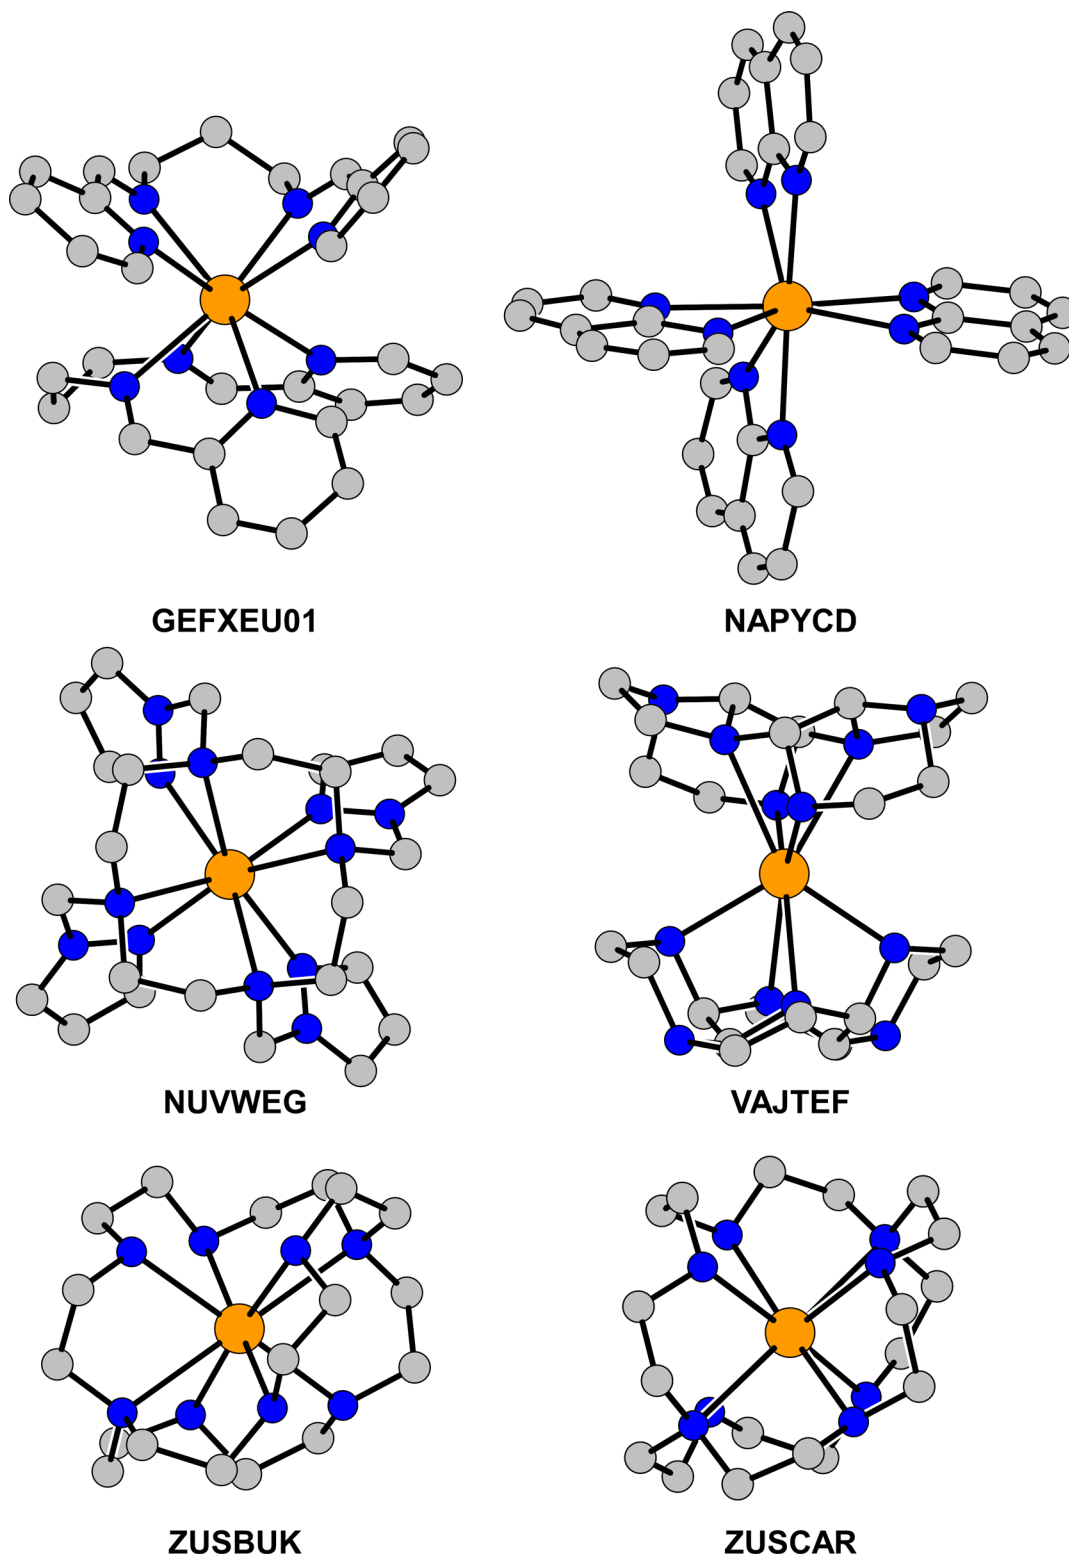

**Fig. S1.** Illustration of the Cd(II) coordination spheres and REFCODES of the compounds retrieved from the CSD
